# Supplementary material
Source: publisher site journal article supplement (https://www.dovepress.com/article/403243)
Supplement: Supplementary file 1 [file get_supplementary_file.php]

## Supplementary data

Table 1 Documents included in the main path

| **Citation** | **Topic** | **Country** | **Study type** | **Setting** | **Definition** | **Advantages** | **Critical factors** | **Keywords** |
| --- | --- | --- | --- | --- | --- | --- | --- | --- |
| Hyde P, 2004. 36 | Culture and performance as emergent properties of service design | UK | Multiple case studies | Mental healthcare | N/A | Performance improvement. | Organizational culture that is influenced by psychodynamics of organizational members and influence organizational change, inertia, and performance. Users and staff management. Service design, client-staff relations, interactions and culture, local contingencies, and societal factors. Unconscious processes, codes, and culture/performance relationships. Recursive processes. | co-production; health care; organizational culture; organizational design; organizational performance; service users |
| Nambisan P, 2009. 38 | Theoretical framework to analyse consumer value cocreation | USA | Multiple case studies | Healthcare | N/A | Improvement of quality, value, customer relationship management in terms of loyalty, satisfaction, and consumer perceptions about the image of the company. Generation of innovative and appealing ideas, research support, service improvement and public policies development and diffusion. Reduction of innovation costs and time. | Knowledge management perspective (explicit or tacit and the combinations), knowledges, community governance and leadership. | consumer participation; innovation, knowledge creation; value cocreation |
| Gill L, 2011. 33 | Client orientation, client involvement, provider empowerment and client empowerment as influencing service participant interaction | Australia | Multiple case studies | Not for profit healthcare sector | N/A | Perceived client benefit improvement. Positive impact on client retention, quality of service and outcomes. | Management of trust, involvements, empowerment, adaptation, learning and exchange of knowledge. Service orientation, employee commitment, user involvement, positive or supportive relations and team environment. Role of supporters and facilitators. Consultative and reciprocal dialogue. Users wills and staff training. | customer orientation; empowerment; elderly people; health care; community care |
| Fotaki M, 2011. 32 | Roles that users might assume in new hybrid arrangements between markets, collaborations, and steering | UK, Sweden | Opinion paper | Healthcare | N/A | Incentive of responsive and efficient systems. Provision of patient-centric and welfare services coordinating various stakeholders. Transfer of costs from the use of voluntary instead of paid personnel. | Partnerships with users and citizens. Relationships management of state, citizens, communities, and providers. Development of training plan. Management of beliefs, values, and experiences. Understanding of patient's skills, knowledges, and interests. Awareness about vulnerabilities such as political influences. | N/A |
| Mccoll-Kennedy JR, 2012*. 37 | What healthcare customers do when they cocreate value | Australia | Interpretative analysis | Oncology | Customer value cocreation is the benefit realized from integration of resources through activities and interactions with collaborators in the customer's service network that is multiparty, all-encompassing process including the local firm and potentially other market-facing and public sources, private sources as well as customer activities. | Improvement of psychological wellbeing, medical status, and satisfaction of the users with the physicians. | Integration of resources from other firms, service providers (clinics, hospitals, professionals), others outside (peers, families, friends, communities, groups, foundations, and other customers) and programs or government departments. Customers and users’ involvement. | value cocreation; value; coproduction; practice styles; health care |
| Elg M, 2012*. 31 | Model for co-creation | Sweden | Multiple case studies | Orthopaedic care, rehabilitation care and gastroenterology care | N/A | Collection of original idea from the patients, incentive for healthcare service development, deeper understanding of the experience of the patient and creation of patient-centred care. Holistic understanding of critical events and areas, considering multiple aspects of life and contexts invisible to the provider. | Coexistence of outside-in and inside-out lenses with focuses on efficiency and effectiveness. Involvement of patients to be aware about the full course of the health problem (symptoms, examinations, treatments, follow-up, rehabilitation). | co-creation; service development; health care; action research; learning |
| Boye N, 2012. 28 | Business models for co-production | Denmark | Opinion paper | Experimental biomedicine | Coproduction: provide activation and make operational the required resources together with the relevant general and specific knowledge to alleviate or solve an individual's health problem in the most flexible and sustainable way. | Activation of knowledge about health, healthy choices, and health states. Creation of personalized models based on health-related data and evidence-based approaches. Attention to the ethical dimension. | Understanding of the full pathway (self-testing, monitoring, lifestyle, prevention, and care), knowledges, energy and commitment of users and caregivers and involve them as assets. | primary prevention; secondary prevention; tertiary prevention; care models; information and communication technology (ICT), patient empowerment; health education; in silico medicine |
| Sabadosa KA, 2014. 41 | Model for co-improvement | USA | Case Study | Cystic fibrosis | N/A | Improvement on quality of care and on emerging sciences, arts, and pedagogy through the use of data. | Collaboration between families, patients, and professionals. Attention to mental and emotional readiness through listening, learning and personal participation involving informed and activated patients and prepared and proactive professionals. | chronic disease management; clinical microsystem; continuous quality improvement; patient-centred care; quality improvement |
| Hardyman W, 2015*. 35 | Patient engagement in healthcare at micro-level | UK | Opinion paper | Healthcare at micro-level | N/A | Improvement of accountability, use of information and lay-involvement in decision making. Creation of value and patient-centred care through experience. | Definition the rationales (who, why, how), levels (macro, meso, micro), perspectives (experts, lay knowledge), nature of interactions, relationships and roles, and engagement methods. Clarification about conceptualization, meaning of participation, roles and power, professional status, perspectives on knowledge and resistance. Separation about how subject see their role and the collaboration and citizens and users’ perspectives. Management of multiple providers and professionals and the symmetry of knowledges, skills, power, expertise, experiences, and capacities. | patient engagement; value co-creation; service-dominant logic; micro-level approach |
| Batalden M, 2016*. 27 | Implications and challenges of coproduction | USA, UK | Opinion paper | Primary care | N/A | Facilitation of good health outcomes at lower costs. | Shared decision making, patient engagement, patient activation and relationship-centred care. Attention to self-care and self-management, desires and abilities of patients, and professional-centric priorities. Adaptation to necessities of families and patients. Engagement of professionals and patients. Evaluation of the long-term return. Definition of boundaries, requirements in terms of skills, knowledges and dispositions, organizational forms and structures and new metrics for measuring success. | Health professions education; health services research; healthcare quality improvement; patient-centred care; social sciences |
| Greenhalgh T, 2016*. 34 | Philosophical assumptions, principles of success and explanations of failure concerning co-creation | UK, Australia | Case Study | Research in community-based health services | Co-creation is the collaborative knowledge generation by academics working alongside other stakeholders. Co-creation is joint creation and evolution of value with stockholding individuals, intensified and enacted through platforms of engagement, virtualized and emergent from ecosystems of capabilities, and actualized and embodied in domains of experiences, expanding wealth-welfare-wellbeing. | Improvement of human experience, social impact, and value generation. | Definition of the system perspective (assuming emergence, local adaptation, nonlinearity), frame of research, responsibilities, and roles. Emphasis on processes (program, relationships, governance, and facilitation concerning leadership and conflict management), human experiences and interactions. Creation of robust governance, management systems and ground rules. Attention to structural complexity and multiple competing interests, power, and complaints, unclear and shifting goals, unstable structure, relationships, and conflict management. | co-creation; knowledge production; health research systems |
| Clarke D, 2017. 29 | Reported outcomes of co-production as an intervention to improve quality of service | UK | Review | Acute healthcare | Co-production is the voluntary or involuntary involvement of users in the design, management, delivery, or evaluation of services. | Improvement of patient-focus, healthcare quality, community links, empowered partnerships, trust and rapport, creativity, understanding and knowledges of patients, careers and staff. Positive impact on patient satisfaction, experience, idea generation and outcomes and reduction of complications. Positive results on staff well-being, recognition of needs and positive attitudes. | Definition of a plan and responsibilities. Inclusion and involvement of the perspective of the patient and the staff using participatory design. Management of potential lack of progress from problems and solution identification and of possible long time taken. Elimination of barriers such as lack of support, resources or authority/leadership, organizational support, logistical problems concerning the regular participation to meetings (e.g., elderly patients, turnover of the staff, additional workloads). | acute healthcare; co-production; rapid evidence synthesis; systematic review |
| Palmer VJ, 2019. 40 | Experience-based co-design model | Australia | Opinion paper | Mental healthcare | Participatory models are defined the new zeitgeist (spirit of our time) and are concerning the quality evaluation and improvement through voice and engagement and empowerment of users and individual and societal improvement of quality of life, health outcomes and experiences. Eight mechanisms are involved: recognition, dialogue, cooperation, accountability, mobilization, enactment, creativity and attainment. | Production of public value and social cohesion. Positive impact on individual control and system efficiencies. | Identification of mechanisms (processes and structures) and implementation plan, engaging staff, collecting, and understanding experiences, establishing collaboration and codesign groups. Elimination of barriers concerning lack of critical engagement and issues of power, relations and representations or social exclusions. Integration of quantitative and qualitative perspectives. Transformation from "I" to "We", from recognition to multi-stakeholder’s dialogue, cooperation, and enactment through constant change. | medical humanities; mental health care; philosophy of medicine/health care; social science |
| O'Brien J, 2021. 39 | Research on co-design methods in mental health for Culturally and Linguistically Diverse communities | Australia | Review | Mental healthcare | Co-design is an approach to co-create products, experiences and services and it is used as a framework for quality improvement and service evaluation. | Positive impact on quality. Decreasing of barriers and improvement on the access to service. | Attention to narrative theory, dialogical ethics, and cooperative and empowerment theory for understanding processes of change with the value of openness, respect, collaboration, and empowerments. Cross cultural training and long-term relations. Understanding of relationships and effective communication. Consideration of culture and understanding, trust, power, differentials, confidentiality, and communication. | community-based research; ethnicity and health; mental health services; minority ethnic clients; service delivery and organisation; service user involvement |
| Tindall RM, 2021. 42 | Information’s for future co-designers | Australia | Case Study | Mental healthcare | Co-design uses the experience of clinicians, consumers and careers and provocateurs to understand and develop innovative strategies. It relates with the creation of a safe environment where decisions are made collaboratively, and power imbalances are acknowledged and mitigated. Approach to service development and design that values all voices, designing not for people but with them. | Support for design and implementation. | Attention to management of team work together and to clarification of expectations, roles, and responsibilities. Recognition of valuable contributions of each role. Unplanned conversations, non-verbal communication and pre and post session reflections. Balance between true co-design and budget or legal requirements. Management and mitigation of the influence of predetermined decisions and power using a collaborative leadership and transparent communication. | co-design; experiential research; health care; lived experience; mental health |
| Cox R, 2022a. 30 | Capability framework for partnerships | Australia, Canada, New Zeeland, Singapore, Sweden, The Netherlands, UK, USA | Delphi study | Healthcare | N/A | N/A | Attention to fundamental capabilities relating personal attributes, relationships, communication, and principles and practices such as knowledges, skills, attitudes, and values including behaviour beyond competences of users, families, communities and staff. Attention to growing capabilities such as networking, celebrating success and sharing learnings. | capability; consumer and community involvement; Delphi; learning; partnerships; quality improvement; training |
| * Papers already included in the ranking of the top 15 cited papers of the review | | | | | | | | |

Table 2 Documents included in the ranking the top 15 cited papers

| **Citation** | **Included** | **Topic** | **Country** | **Study type** | **Setting** | **Results** | **Keywords** |
| --- | --- | --- | --- | --- | --- | --- | --- |
| Lee HJ, 2017. 45 | No | Food contamination | USA | N/D | N/D | N/D | mycotoxins; cereals; co-occurrence; combined toxicity |
| Shahidi F, 2015. 46 | No | Chemistry production | Canada | N/D | N/D | N/D | N/A |
| Sweeney JC, 2015. 53 | Yes | Customer value cocreation in health care | Australia | Multiple case studies | Chronical care | Integrated care model has benefits for both customers and providers and can enhance customer Effort in Value Cocreation Activities that impact on to quality of life, satisfaction with service and behavioural intentions | customer effort in value cocreation activities; customer effort; value cocreation; hierarchy; activities; resource integration; participation; quality of life; satisfaction; health care |
| Oliver K, 2019. 51 | Yes | Coproduction as a collaborative model of research | UK | Opinion paper | Research in healthcare | It is important to identify specific motivations for coproduction, to clarify exactly which outcomes are required for whom for any particular piece of research, to select strategies specifically designed to enable these outcomes to be achieved and to proper evaluate them, to use cautions in approaching coproduction. Main arguments are: substantive, instrumental, normative and political. Costs: practical, researchers, professional and personal, research, stakeholders are related to productivity lost conflicts and motivation. | coproduction; research ethics; stakeholder engagement; evidence use; policy and practice |
| Donetto S, 2015. 48 | Yes | Implementation and adaptation of Experience based Co-design and challenges of co-design work within healthcare settings. | UK | Opinion paper | Public services and healthcare | Experience based Co-design is powerful but also challenging, as it requires both staff and patients to renegotiate their roles and expectations as part of a reconfiguration of the relationships of power between citizens and public services. | experience-based co-design; healthcare organizations; participatory design |
| Frow P, 2016. 50 | Yes | Co-creation practices | Australia | Opinion paper | Healthcare | Co-creation practices play a central role in shaping the service ecosystem, influencing which resources are available, when they are employed, and how they are integrated. Four levels of healthcare ecosystem: Mega (Government; Funding, Regulatory and Media), Macro (Authorities, Associations, Unions, Insurers), Meso (Hospitals, Clinics, Local health, Care homes and hospices), Micro (Focal, Clinicians, Nursing, Allied, Families, Friends and other Friends). | co-creation practices; resource integration; value co-creation; ecosystem; health care |
| Robert G, 2015. 52 | Yes | Co-design in healthcare | UK | Multiple case studies | Intensive care and breast cancer | Codesign represents a radical reconceptualization of the role of patients and a structured process for involving them throughout all stages of quality improvement. Our focus needs to shift away from collecting more data on patient experience towards embedding codesign as a way of doing things. Evidence is growing about the effectiveness of codesign approaches but lack of evaluation of other approaches makes comparison difficult. | N/A |
| Trebble T, 2003. 47 | No | Cancer treatment | UK | N/D | N/D | N/D | fish oil; antioxidants; tumour necrosis factor-a; interleukin 6 |
| Dunston R, 2009. 49 | Yes | Possibilities and challenges of system-wide co-production for health | Australia | Opinion paper | Healthcare | Co-production has both beneficial, but also problematic implications for the organization of such services, for professional practice and education. | co-production; health services reform; professional learning |
| Hackmann G, 2014. 44 | No | Cyber-physical codesign approach based on wireless sensor networks | N/A | N/D | N/D | N/D | wireless sensor networks; structural health monitoring; cyber-physical systems |
